# Supplementary material
Source: publisher site journal article supplement (https://www.jstage.jst.go.jp/article/geochemj/47/2/47_2.0235/_supplement/_download/47_2.0235_1.pdf)
Supplement: Supplementary file 1 [file 47_2.0235_1.pdf]

**Supplementary Table S1. Representative chemical EPM analysis of secondary minerals in metabasalts from the Rocas Verdes ophiolites**

**Chlorite**

| Sample No          | TNO715  | TNO715  | FO0335B    | FO0335B    | FO0335C    | FO0335C    | FO0335D    | FO0335D    | FO0626A         | FO0626A         |
|--------------------|---------|---------|------------|------------|------------|------------|------------|------------|-----------------|-----------------|
| Ophiolitic Complex | Tortuga | Tortuga | Carlos III | Capitán Aracena | Capitán Aracena |
| Anal. No           | #18     | #22     | #12        | #13        | #35        | #36        | #22        | #30        | #25             | #28             |
| SiO2               | 29.44   | 27.08   | 26.80      | 27.43      | 27.17      | 25.88      | 29.34      | 27.47      | 27.13           | 27.46           |
| TiO2               | 0.01    | 0.03    | 0.02       | 0.00       | 0.08       | 0.06       | 0.05       | 0.01       | 0.00            | 0.03            |
| Al2O3              | 17.66   | 20.17   | 18.56      | 17.93      | 18.91      | 19.07      | 17.86      | 18.79      | 20.10           | 19.15           |
| Cr2O3              | 0.01    | 0.03    | 0.00       | 0.00       | 0.04       | 0.02       | 0.00       | 0.00       | 0.03            | 0.03            |
| FeO                | 18.47   | 20.14   | 27.40      | 27.04      | 25.99      | 26.40      | 23.74      | 24.18      | 21.07           | 21.16           |
| MnO                | 0.32    | 0.34    | 0.39       | 0.36       | 0.37       | 0.38       | 0.39       | 0.49       | 0.32            | 0.34            |
| MgO                | 22.13   | 20.18   | 15.01      | 15.10      | 15.35      | 15.39      | 16.58      | 17.14      | 19.56           | 19.60           |
| H2O                | 11.89   | 11.75   | 11.31      | 11.31      | 11.38      | 11.21      | 11.58      | 11.51      | 11.73           | 11.66           |
| Total              | 99.93   | 99.71   | 99.49      | 99.17      | 99.28      | 98.40      | 99.54      | 99.58      | 99.93           | 99.43           |
| Si                 | 5.937   | 5.531   | 5.682      | 5.819      | 5.726      | 5.535      | 6.076      | 5.724      | 5.550           | 5.651           |
| Al(IV)             | 2.063   | 2.469   | 2.318      | 2.181      | 2.274      | 2.465      | 1.924      | 2.276      | 2.450           | 2.349           |
| Σ                  | 8.000   | 8.000   | 8.000      | 8.000      | 8.000      | 8.000      | 8.000      | 8.000      | 8.000           | 8.000           |
| Al(VI)             | 2.134   | 2.385   | 2.319      | 2.301      | 2.423      | 2.341      | 2.433      | 2.340      | 2.396           | 2.296           |
| Cr                 | 0.001   | 0.004   | 0.000      | 0.000      | 0.006      | 0.003      | 0.000      | 0.000      | 0.004           | 0.005           |
| Ti                 | 0.002   | 0.005   | 0.003      | 0.000      | 0.013      | 0.009      | 0.008      | 0.001      | 0.000           | 0.005           |
| Fe                 | 3.116   | 3.439   | 4.859      | 4.798      | 4.580      | 4.723      | 4.110      | 4.214      | 3.605           | 3.641           |
| Mn                 | 0.054   | 0.059   | 0.070      | 0.064      | 0.066      | 0.070      | 0.068      | 0.086      | 0.056           | 0.059           |
| Mg                 | 6.654   | 6.143   | 4.745      | 4.776      | 4.822      | 4.906      | 5.118      | 5.326      | 5.965           | 6.013           |
| Σ                  | 11.962  | 12.035  | 11.997     | 11.939     | 11.910     | 12.052     | 11.738     | 11.967     | 12.025          | 12.019          |
| H                  | 16.000  | 16.000  | 16.000     | 16.000     | 16.000     | 16.000     | 16.000     | 16.000     | 16.000          | 16.000          |

**Epidote**

| Sample No          | TNO715  | TNO715  | FO0335B    | FO0335B    | FO0335C    | FO0335C    | FO0335D    | FO0335D    | FO0626A         | FO0626A         |
|--------------------|---------|---------|------------|------------|------------|------------|------------|------------|-----------------|-----------------|
| Ophiolitic Complex | Tortuga | Tortuga | Carlos III | Capitán Aracena | Capitán Aracena |
| Anal. No           | #10     | #20     | #1         | #2         | #47        | #51        | #4         | #6         | #20             | #32             |
| SiO2               | 37.15   | 36.90   | 37.37      | 37.62      | 37.55      | 36.83      | 37.84      | 37.78      | 37.99           | 37.62           |
| TiO2               | 0.09    | 0.23    | 0.12       | 0.10       | 0.10       | 0.12       | 0.11       | 0.08       | 0.11            | 0.07            |
| Al2O3              | 23.23   | 23.41   | 20.54      | 20.58      | 23.51      | 22.73      | 25.15      | 25.75      | 25.26           | 27.65           |
| Cr2O3              | 0.03    | 0.03    | 0.00       | 0.00       | 0.05       | 0.00       | 0.00       | 0.00       | 0.05            | 0.02            |
| Fe2O3              | 13.57   | 13.88   | 16.57      | 16.65      | 13.41      | 13.27      | 11.04      | 10.28      | 10.81           | 7.95            |
| Mn2O3              | 0.23    | 0.06    | 0.08       | 0.08       | 0.00       | 0.20       | 0.09       | 0.05       | 0.08            | 0.11            |
| MgO                | 0.00    | 0.02    | 0.02       | 0.01       | 0.03       | 0.06       | 0.00       | 0.02       | 0.22            | 0.02            |
| CaO                | 23.61   | 23.33   | 24.00      | 23.86      | 24.10      | 23.03      | 24.09      | 24.28      | 23.71           | 23.57           |
| H2O                | 1.88    | 1.87    | 1.87       | 1.87       | 1.89       | 1.85       | 1.90       | 1.91       | 1.91            | 1.90            |
| Total              | 99.85   | 99.74   | 100.60     | 100.79     | 100.65     | 98.12      | 100.23     | 100.15     | 100.15          | 98.91           |
| Si                 | 2.968   | 2.951   | 2.999      | 3.010      | 2.973      | 2.989      | 2.980      | 2.972      | 2.988           | 2.964           |
| Ti                 | 0.005   | 0.014   | 0.007      | 0.006      | 0.006      | 0.008      | 0.007      | 0.005      | 0.006           | 0.004           |
| Al                 | 2.187   | 2.206   | 1.942      | 1.941      | 2.194      | 2.174      | 2.335      | 2.387      | 2.342           | 2.568           |
| Cr                 | 0.002   | 0.002   | 0.000      | 0.000      | 0.003      | 0.000      | 0.000      | 0.000      | 0.003           | 0.001           |
| Fe3                | 0.816   | 0.835   | 1.000      | 1.003      | 0.799      | 0.811      | 0.654      | 0.609      | 0.640           | 0.471           |
| Mn3                | 0.014   | 0.004   | 0.005      | 0.005      | 0.000      | 0.013      | 0.006      | 0.003      | 0.005           | 0.006           |
| Ca                 | 2.020   | 1.998   | 2.063      | 2.045      | 2.045      | 2.002      | 2.033      | 2.047      | 1.999           | 1.990           |
| H                  | 1.000   | 1.000   | 1.000      | 1.000      | 1.000      | 1.000      | 1.000      | 1.000      | 1.000           | 1.000           |
| Pistacite          | 27.17   | 27.47   | 34.00      | 34.06      | 26.69      | 27.16      | 21.89      | 20.32      | 21.46           | 15.51           |



**Pumpellyite**

| <b>Sample No</b>   | <b>FO0626A</b> | <b>FO0626A</b>  |
|--------------------|----------------|-----------------|
| Ophiolitic Complex | Capitán Aracer | Capitán Aracena |
| Anal. No           | #37            | #38             |
| SiO2               | 37.00          | 36.86           |
| TiO2               | 0.03           | 0.05            |
| Al2O3              | 26.03          | 25.31           |
| Cr2O3              | 0.04           | 0.06            |
| FeO                | 0.66           | 0.95            |
| Fe2O3              | 2.91           | 3.13            |
| MnO                | 0.07           | 0.13            |
| MgO                | 3.29           | 3.22            |
| CaO                | 23.54          | 23.30           |
| H2O                | 1.89           | 1.87            |
| Total              | 95.48          | 94.90           |
| Si                 | 5.882          | 5.910           |
| Al(IV)             | 0.118          | 0.090           |
| Σ                  | 6.000          | 6.000           |
| Ti                 | 0.004          | 0.006           |
| Al(VI)             | 4.758          | 4.692           |
| Cr                 | 0.005          | 0.008           |
| Fe3                | 0.348          | 0.378           |
| Σ                  | 5.114          | 5.084           |
| Fe2                | 0.088          | 0.127           |
| Mn                 | 0.009          | 0.018           |
| Mg                 | 0.779          | 0.769           |
| Σ                  | 0.876          | 0.914           |
| Ca                 | 4.009          | 4.002           |
| H                  | 2.000          | 2.000           |

**Supplementary Table S2. Major and trace element whole rock compositions for different lithologies of the Capitán Aracena, Carlos III and Tortuga ophiolites**

| Sample No                      | FO0626                         | FO0657                         | FO0658                         | FO0335b                        | FO0336                         | FO0337                         | FO0653                         | FO0656                         | FO0659                         | FO0662                          |
|--------------------------------|--------------------------------|--------------------------------|--------------------------------|--------------------------------|--------------------------------|--------------------------------|--------------------------------|--------------------------------|--------------------------------|---------------------------------|
| Geographic coordinates         | 54°19'08.2``S<br>71°01'07.2``W | 54°11'15.1``S<br>71°32'59.5``W | 54°11'06.8``S<br>71°32'52.2``W | 53°36'23.5``S<br>72°17'39.3``W | 53°39'08.7``S<br>72°15'16.6``W | 53°40'11.2``S<br>72°18'00.3``W | 54°11'31.8``S<br>71°33'59.8``W | 54°11'15.1``S<br>71°32'59.5``W | 54°11'06.8``S<br>71°32'52.2``W | 54°13'09.1``S 71°<br>35'50.4``W |
| Age                            | Late Jurassic                   |
| Ophiolitic Complex             | Capitán Aracena                | Capitán Aracena                | Capitán Aracena                | Carlos III                     | Carlos III                     | Carlos III                     | Capitán Aracena                | Capitán Aracena                | Capitán Aracena                | Capitán Aracena                 |
| Rock type                      | Volcanic                       | Volcanic                       | Volcanic                       | Volcanic                       | Volcanic                       | Volcanic                       | Dike                           | Dike                           | Dike                           | Metamorphic                     |
| Lithology                      | Pillow basalt                  | Basalt                         | Pillow basalt                  | Basalt                         | Basalt                         | Basalt                         | Basalt                         | Basalt                         | Basalt                         | Greenschist                     |
| <b>Major oxides</b>            |                                |                                |                                |                                |                                |                                |                                |                                |                                |                                 |
| SiO <sub>2</sub>               | 47.7                           | 50.71                          | 51.5                           | 52.95                          | 50.5                           | 50.2                           | 47.02                          | 49.2                           | 52.38                          | 46.88                           |
| TiO <sub>2</sub>               | 1.61                           | 0.8                            | 1.02                           | 1.48                           | 2.41                           | 1.73                           | 2.23                           | 1.3                            | 2.22                           | 1.3                             |
| Al <sub>2</sub> O <sub>3</sub> | 16                             | 15.4                           | 14.2                           | 14                             | 13                             | 14.1                           | 14.6                           | 15.5                           | 12.5                           | 15.2                            |
| Fe <sub>2</sub> O <sub>3</sub> | 2.53                           | 2.2                            | 3.13                           | 2.15                           | 4.23                           | 2.11                           | 4.58                           | 2.1                            | 3.86                           | 3.35                            |
| FeO                            | 7.72                           | 8.52                           | 8.88                           | 9.16                           | 10.28                          | 11.48                          | 11.08                          | 8.68                           | 12.76                          | 7.84                            |
| MnO                            | 0.14                           | 0.2                            | 0.21                           | 0.19                           | 0.25                           | 0.22                           | 0.23                           | 0.17                           | 0.22                           | 0.21                            |
| MgO                            | 6.85                           | 6.61                           | 6.47                           | 5.43                           | 3.72                           | 5.78                           | 5.78                           | 7.92                           | 3.55                           | 8.38                            |
| CaO                            | 9.78                           | 8.43                           | 7.59                           | 6.81                           | 7                              | 5.04                           | 6.28                           | 8.16                           | 5.44                           | 7.45                            |
| Na <sub>2</sub> O              | 3.86                           | 5.09                           | 5.01                           | 3.99                           | 3.85                           | 4.21                           | 4.69                           | 4.23                           | 4.63                           | 3.17                            |
| K <sub>2</sub> O               | 0.2                            | 0.28                           | 0.23                           | 0.04                           | 0.52                           | 0.1                            | 0.37                           | 0.7                            | 0.53                           | 1.3                             |
| P <sub>2</sub> O <sub>5</sub>  | 0.21                           | 0.18                           | 0.17                           | 0.29                           | 0.72                           | 0.37                           | 0.31                           | 0.24                           | 0.41                           | 0.23                            |
| LOI                            | 3.24                           | 1.39                           | 1.14                           | 3.33                           | 3.17                           | 4.28                           | 2.55                           | 1.56                           | 1.11                           | 4.54                            |
| Total                          | 99.84                          | 99.81                          | 99.55                          | 99.82                          | 99.65                          | 99.62                          | 99.72                          | 99.76                          | 99.61                          | 99.85                           |
| <b>Trace elements</b>          |                                |                                |                                |                                |                                |                                |                                |                                |                                |                                 |
| Sr                             | 212                            | 33                             | 116                            | 80                             | 228                            | 49                             | 38                             | 122                            | 55                             | 140                             |
| Y                              | 31                             | 16                             | 22                             | 33                             | 65                             | 27                             | 46                             | 27                             | 85                             | 33                              |
| Nb                             |                                |                                |                                |                                |                                |                                |                                |                                |                                |                                 |
| Zr                             | 102                            | 43                             | 57                             | 104                            | 152                            | 93                             | 170                            | 100                            | 233                            | 91                              |
| Ba                             | 17                             | 59                             | 21                             | 24                             | 229                            | 18                             | 59                             | 155                            | 250                            | 395                             |
| La                             | 6.6                            | 4.6                            | 6.8                            | 17                             | 18                             | 16                             | 7.8                            | 10                             | 14                             | 10                              |
| Ce                             | 17                             | 9.8                            | 16                             | 35                             | 47                             | 35                             | 23                             | 25                             | 37                             | 24                              |
| Nd                             | 14                             | 7.3                            | 12                             | 22                             | 34                             | 23                             | 20                             | 18                             | 33                             | 17                              |
| Sm                             | 4.22                           | 1.89                           | 2.88                           | 5.43                           | 9.09                           | 5.25                           | 5.42                           | 3.68                           | 9.64                           | 4.15                            |
| Eu                             | 1.39                           | 0.54                           | 0.9                            | 1.57                           | 3.16                           | 1.7                            | 1.63                           | 1.34                           | 2.86                           | 1.55                            |
| Gd                             | 4.61                           | 2.48                           | 3.17                           | 5.95                           | 10.75                          | 4.72                           | 6.43                           | 4.13                           | 12.89                          | 5.07                            |
| Dy                             | 5.61                           | 3.04                           | 4.04                           | 6.02                           | 12.24                          | 5.35                           | 8.53                           | 5.05                           | 16.1                           | 6.25                            |
| Ho                             | 1.18                           | 0.68                           | 0.92                           | 1.32                           | 2.57                           | 1.16                           | 1.88                           | 1.09                           | 3.58                           | 1.37                            |
| Er                             | 3.36                           | 1.88                           | 2.55                           | 3.87                           | 7                              | 3.18                           | 4.96                           | 2.76                           | 10.62                          | 4.14                            |
| Yb                             | 3.38                           | 1.89                           | 2.51                           | 3.83                           | 6.98                           | 3.17                           | 5.01                           | 2.84                           | 10.6                           | 4.05                            |
| Lu                             | 0.51                           | 0.3                            | 0.4                            | 0.59                           | 1.07                           | 0.5                            | 0.74                           | 0.45                           | 1.58                           | 0.64                            |
| Hf                             | 3.8                            | 2                              | 2.7                            | 5                              | 5.2                            | 4                              | 4                              | 3.1                            | 7.6                            | 3.8                             |
| Ta                             |                                |                                |                                |                                |                                |                                |                                |                                |                                |                                 |
| Sc                             | 37                             | 36                             | 43                             | 48                             | 43                             | 42                             | 40                             | 42                             | 39                             | 53                              |
| V                              | 268                            | 265                            | 292                            | 285                            | 226                            | 390                            | 481                            | 294                            | 325                            | 315                             |
| Co                             | 35                             | 25                             | 32                             | 29                             | 26                             | 25                             | 36                             | 33                             | 34                             | 31                              |
| Ni                             | 181                            | 71                             | 86                             | 15                             | 26                             | 9                              | 17                             | 106                            | 17                             | 143                             |
| Cu                             | 135                            | 12                             | <2                             | 14                             | 58                             | <2                             | 4                              | 51                             | 36                             | 31                              |
| Zn                             | 84                             | 82                             | 129                            | 136                            | 134                            | 138                            | 118                            | 92                             | 159                            | 98                              |
| Th                             |                                |                                |                                |                                |                                |                                |                                |                                |                                |                                 |
| Cr                             | 269                            | 140                            | 164                            | 16                             | 28                             | 5                              | 22                             | 193                            | 14                             | 258                             |

Datum of geographic coordinates is WGS84.



**Supplementary Table S3. SHRIMP U-Pb zircon data of Late Jurassic - Early Cretaceous rocks in the Rocas Verdes ophiolites and an associated plutonic rock**

| Grain spot                                                                          | U (ppm) | Th (ppm) | Th/U | <sup>206</sup> Pb*/ <sup>206</sup> Pb | <sup>204</sup> Pb/ <sup>206</sup> Pb | f <sub>206</sub> % | Total                               |        | Radiogenic                           |        | Age (Ma)                            |        |       |     |
|-------------------------------------------------------------------------------------|---------|----------|------|---------------------------------------|--------------------------------------|--------------------|-------------------------------------|--------|--------------------------------------|--------|-------------------------------------|--------|-------|-----|
|                                                                                     |         |          |      |                                       |                                      |                    | <sup>238</sup> U/ <sup>206</sup> Pb | ±      | <sup>207</sup> Pb/ <sup>206</sup> Pb | ±      | <sup>206</sup> Pb/ <sup>238</sup> U | ±      |       |     |
| <b>Medium-grained gabbro (FO0671); 54°03'10.2"S - 71°41'31.2"W.</b>                 |         |          |      |                                       |                                      |                    |                                     |        |                                      |        |                                     |        |       |     |
| 1.1                                                                                 | 361     | 137      | 0.38 | 7.5                                   | 0.001091                             | 0.94               | 41.60                               | 0.54   | 0.0566                               | 0.0013 | 0.0238                              | 0.0003 | 151.7 | 2.0 |
| 2.1*                                                                                | 908     | 516      | 0.57 | 19.8                                  | 0.000114                             | 0.39               | 39.42                               | 0.44   | 0.0524                               | 0.0008 | 0.0253                              | 0.0003 | 160.9 | 1.8 |
| 3.1                                                                                 | 367     | 184      | 0.50 | 7.7                                   | 0.001500                             | 0.78               | 41.24                               | 0.53   | 0.0553                               | 0.0013 | 0.0241                              | 0.0003 | 153.3 | 2.0 |
| 4.1*                                                                                | 899     | 502      | 0.56 | 19.4                                  | 0.000429                             | 0.13               | 39.78                               | 0.45   | 0.0503                               | 0.0008 | 0.0251                              | 0.0003 | 159.8 | 1.8 |
| 5.1*                                                                                | 916     | 372      | 0.41 | 20.3                                  | 0.000597                             | 0.29               | 38.85                               | 0.45   | 0.0516                               | 0.0008 | 0.0257                              | 0.0003 | 163.4 | 1.9 |
| 6.1*                                                                                | 1995    | 1285     | 0.64 | 44.5                                  | 0.000217                             | 0.09               | 38.55                               | 0.41   | 0.0501                               | 0.0005 | 0.0259                              | 0.0003 | 164.9 | 1.7 |
| 7.1                                                                                 | 437     | 151      | 0.35 | 9.2                                   | 0.001000                             | 0.92               | 40.72                               | 0.51   | 0.0565                               | 0.0012 | 0.0243                              | 0.0003 | 155.0 | 1.9 |
| 8.1*                                                                                | 961     | 426      | 0.44 | 21.4                                  | 0.000463                             | 0.35               | 38.63                               | 0.44   | 0.0521                               | 0.0008 | 0.0258                              | 0.0003 | 164.2 | 1.9 |
| 9.1*                                                                                | 1368    | 766      | 0.56 | 29.7                                  | 0.000236                             | 0.24               | 39.64                               | 0.43   | 0.0512                               | 0.0006 | 0.0252                              | 0.0003 | 160.2 | 1.7 |
| 10.1*                                                                               | 891     | 612      | 0.69 | 19.1                                  | 0.000638                             | 0.16               | 40.07                               | 0.45   | 0.0505                               | 0.0008 | 0.0249                              | 0.0003 | 158.6 | 1.8 |
| 11.1*                                                                               | 1092    | 496      | 0.45 | 23.8                                  | 0.000424                             | 0.17               | 39.47                               | 0.44   | 0.0506                               | 0.0007 | 0.0253                              | 0.0003 | 161.0 | 1.8 |
| 12.1                                                                                | 363     | 416      | 0.43 | 20.2                                  | 0.000103                             | 0.27               | 40.90                               | 0.46   | 0.0513                               | 0.0011 | 0.0244                              | 0.0003 | 155.3 | 1.7 |
| 13.1                                                                                | 147     | 46       | 0.31 | 3.2                                   | 0.001563                             | 2.13               | 39.93                               | 0.66   | 0.0661                               | 0.0023 | 0.0245                              | 0.0004 | 156.1 | 2.6 |
| <b>Coarse-grained leucogranite (FO0667); 54°04'03.7"S - 71°53'02.0"W.</b>           |         |          |      |                                       |                                      |                    |                                     |        |                                      |        |                                     |        |       |     |
| 1.1                                                                                 | 393     | 350      | 0.89 | 8.2                                   | 0.000422                             | 0.08               | 41.35                               | 0.52   | 0.0498                               | 0.0011 | 0.0242                              | 0.0003 | 153.9 | 1.9 |
| 2.1                                                                                 | 1698    | 871      | 0.51 | 36.1                                  | 0.001254                             | 0.68               | 40.36                               | 0.44   | 0.0705                               | 0.0047 | 0.0241                              | 0.0003 | 153.6 | 1.9 |
| 3.1                                                                                 | 2850    | 1012     | 0.36 | 59.3                                  | 0.000008                             | 0.08               | 41.26                               | 0.43   | 0.0498                               | 0.0004 | 0.0242                              | 0.0003 | 154.2 | 1.6 |
| 4.1                                                                                 | 139     | 116      | 0.83 | 2.9                                   | 0.000367                             | 0.32               | 41.47                               | 0.65   | 0.0517                               | 0.0019 | 0.0240                              | 0.0004 | 153.1 | 2.4 |
| 5.1                                                                                 | 747     | 334      | 0.45 | 15.6                                  | 0.000058                             | <0.01              | 41.15                               | 0.46   | 0.0492                               | 0.0008 | 0.0243                              | 0.0003 | 154.8 | 1.7 |
| 6.1                                                                                 | 2246    | 909      | 0.40 | 48.7                                  | 0.001496                             | 2.64               | 39.64                               | 0.41   | 0.0702                               | 0.0006 | 0.0246                              | 0.0003 | 156.4 | 1.6 |
| 7.1                                                                                 | 367     | 150      | 0.41 | 7.7                                   | 0.000173                             | 0.29               | 41.08                               | 0.51   | 0.0515                               | 0.0011 | 0.0243                              | 0.0003 | 154.6 | 1.9 |
| 8.1                                                                                 | 3157    | 1197     | 0.38 | 66.2                                  | 0.000019                             | <0.01              | 41.00                               | 0.42   | 0.0488                               | 0.0004 | 0.0244                              | 0.0003 | 155.4 | 1.6 |
| 9.1                                                                                 | 2984    | 2088     | 0.70 | 62.4                                  | 0.000056                             | <0.01              | 41.11                               | 0.42   | 0.0492                               | 0.0004 | 0.0243                              | 0.0003 | 154.9 | 1.6 |
| 10.1                                                                                | 505     | 162      | 0.32 | 10.5                                  | 0.000175                             | 0.09               | 41.22                               | 0.49   | 0.0498                               | 0.0010 | 0.0242                              | 0.0003 | 154.4 | 1.8 |
| 11.1*                                                                               | 1397    | 641      | 0.46 | 29.9                                  | 0.003038                             | 5.32               | 40.13                               | 0.43   | 0.0914                               | 0.0015 | 0.0236                              | 0.0003 | 150.3 | 1.6 |
| 12.1                                                                                | 477     | 198      | 0.41 | 10.2                                  | 0.001095                             | 2.27               | 40.16                               | 0.48   | 0.0672                               | 0.0011 | 0.0243                              | 0.0003 | 155.0 | 1.8 |
| <b>Cherty layer overlying pillow basalts (FO0829); 54°58'49.9"S - 69°58'20.5"W.</b> |         |          |      |                                       |                                      |                    |                                     |        |                                      |        |                                     |        |       |     |
| 1.1                                                                                 | 194     | 172      | 0.89 | 4                                     | 0.000481                             | 0.90               | 45.41                               | 0.72   | 0.0560                               | 0.0019 | 0.0218                              | 0.0003 | 139   | 2   |
| 2.1                                                                                 | 671     | 53       | 0.08 | 25                                    | 0.000084                             | 0.18               | 23.07                               | 0.25   | 0.0532                               | 0.0007 | 0.0433                              | 0.0005 | 273   | 3   |
| 3.1                                                                                 | 527     | 112      | 0.21 | 80                                    | <0.01                                | 5.682              | 0.076                               | 0.0744 | 0.0011                               | 0.1760 | 0.0024                              | 0.0024 | 1045  | 13  |
| 4.1                                                                                 | 1636    | 1062     | 0.65 | 32                                    | 0.000058                             | -0.08              | 44.07                               | 0.47   | 0.0483                               | 0.0006 | 0.0227                              | 0.0002 | 145   | 2   |
| 5.1                                                                                 | 3007    | 5559     | 1.85 | 47                                    | -                                    | <0.01              | 54.57                               | 0.58   | 0.0481                               | 0.0005 | 0.0183                              | 0.0002 | 117   | 1   |
| 6.1                                                                                 | 125     | 97       | 0.78 | 2                                     | 0.000827                             | 0.66               | 46.73                               | 0.79   | 0.0540                               | 0.0023 | 0.0213                              | 0.0004 | 136   | 2   |
| 7.1                                                                                 | 39      | 53       | 1.36 | 1                                     | 0.000433                             | 1.47               | 32.81                               | 0.77   | 0.0616                               | 0.0038 | 0.0300                              | 0.0007 | 191   | 5   |
| 8.1                                                                                 | 423     | 64       | 0.15 | 17                                    | -                                    | 0.19               | 21.49                               | 0.25   | 0.0537                               | 0.0009 | 0.0464                              | 0.0005 | 293   | 3   |
| 9.1                                                                                 | 197     | 158      | 0.80 | 4                                     | -                                    | 0.68               | 47.64                               | 0.76   | 0.0541                               | 0.0019 | 0.0208                              | 0.0003 | 133   | 2   |
| 10.1                                                                                | 485     | 308      | 0.63 | 33                                    | 0.000064                             | 0.19               | 12.65                               | 0.14   | 0.0585                               | 0.0007 | 0.0789                              | 0.0009 | 489   | 5   |
| 11.1                                                                                | 338     | 141      | 0.42 | 6                                     | 0.000381                             | 0.13               | 47.42                               | 0.63   | 0.0498                               | 0.0023 | 0.0211                              | 0.0003 | 134   | 2   |
| 12.1                                                                                | 262     | 244      | 0.93 | 5                                     | 0.000208                             | 0.64               | 46.40                               | 0.64   | 0.0538                               | 0.0016 | 0.0214                              | 0.0003 | 137   | 2   |
| 13.1                                                                                | 243     | 155      | 0.64 | 19                                    | -                                    | 0.17               | 11.07                               | 0.15   | 0.0601                               | 0.0008 | 0.0902                              | 0.0013 | 557   | 7   |
| 14.1                                                                                | 233     | 165      | 0.71 | 4                                     | -                                    | 0.03               | 46.26                               | 0.66   | 0.0490                               | 0.0016 | 0.0216                              | 0.0003 | 138   | 2   |
| 15.1                                                                                | 304     | 226      | 0.74 | 11                                    | 0.000292                             | 0.25               | 24.84                               | 0.30   | 0.0533                               | 0.0010 | 0.0402                              | 0.0005 | 254   | 3   |
| 16.1                                                                                | 465     | 122      | 0.26 | 64                                    | 0.000025                             | 0.04               | 6.282                               | 0.087  | 0.0712                               | 0.0005 | 0.1591                              | 0.0022 | 952   | 12  |
| 17.1                                                                                | 244     | 134      | 0.55 | 19                                    | -                                    | <0.01              | 11.10                               | 0.13   | 0.0576                               | 0.0008 | 0.0902                              | 0.0011 | 557   | 6   |
| 18.1                                                                                | 428     | 310      | 0.73 | 28                                    | 0.000046                             | 0.21               | 13.17                               | 0.15   | 0.0581                               | 0.0007 | 0.0758                              | 0.0009 | 471   | 5   |
| 19.1                                                                                | 471     | 61       | 0.13 | 46                                    | 0.000030                             | 0.58               | 8.746                               | 0.095  | 0.0673                               | 0.0006 | 0.1137                              | 0.0013 | 694   | 7   |
| 20.1                                                                                | 809     | 294      | 0.36 | 16                                    | 0.000310                             | 0.43               | 44.36                               | 0.72   | 0.0523                               | 0.0009 | 0.0224                              | 0.0004 | 143   | 2   |
| 21.1                                                                                | 292     | 51       | 0.17 | 41                                    | 0.000101                             | 0.17               | 6.109                               | 0.068  | 0.0827                               | 0.0008 | 0.1634                              | 0.0018 | 976   | 10  |
| 22.1                                                                                | 146     | 96       | 0.66 | 3                                     | 0.000399                             | 0.36               | 44.33                               | 0.74   | 0.0517                               | 0.0020 | 0.0225                              | 0.0004 | 143   | 2   |
| 23.1                                                                                | 280     | 134      | 0.48 | 5                                     | 0.000437                             | 0.36               | 45.09                               | 0.61   | 0.0517                               | 0.0015 | 0.0221                              | 0.0003 | 141   | 2   |
| 24.1                                                                                | 288     | 223      | 0.78 | 10                                    | 0.000101                             | <0.01              | 24.65                               | 0.36   | 0.0507                               | 0.0011 | 0.0406                              | 0.0006 | 257   | 4   |

Notes: 1. Uncertainties given at the one  $\sigma$  level.  
 2. Error in Temora reference zircon calibration was 0.60% for the analytical session.  
 3. f<sub>206</sub> % denotes the percentage of <sup>206</sup>Pb that is common Pb.  
 4. Correction for common Pb for the U/Pb data has been made using the measured <sup>238</sup>U/<sup>206</sup>Pb and <sup>207</sup>Pb/<sup>206</sup>Pb ratios following Tera and Wasserburg (1972) as outlined in Williams (1998).

Notes: 1. Uncertainties given at the one  $\sigma$  level.  
 2. Error in Temora reference zircon calibration was 0.48% for the analytical session.  
 3. f<sub>206</sub> % denotes the percentage of <sup>206</sup>Pb that is common Pb.  
 4. Correction for common Pb for the U/Pb data has been made using the measured <sup>238</sup>U/<sup>206</sup>Pb and <sup>207</sup>Pb/<sup>206</sup>Pb ratios following Tera and Wasserburg (1972) as outlined in Williams (1998).

Notes: 1. Uncertainties given at the one  $\sigma$  level.  
 2. Error in Temora reference zircon calibration was 0.59% for the analytical session.  
 3. f<sub>206</sub> % denotes the percentage of <sup>206</sup>Pb that is common Pb.  
 4. For areas older than ~800 Ma correction for common Pb made using the measured <sup>204</sup>Pb/<sup>206</sup>Pb ratio.  
 5. For areas younger than ~800 Ma correction for common Pb made using the measured <sup>238</sup>U/<sup>206</sup>Pb and <sup>207</sup>Pb/<sup>206</sup>Pb ratios following Tera and Wasserburg (1972) as outlined in Williams (1998).  
 6. For % Disc, 0% denotes a concordant analysis.

\*: denotes analyses excluded in the age calculation.  
 Datum of geographic coordinates is WGS84.

**Supplementary Table S4a. SHRIMP U-Pb results for titanite in sheared silicic metatuffs from the metamorphic sole thrust of the Rocas Verdes ophiolites**

| area.<br>spot                                           | U<br>(ppm) | Th<br>(ppm) | Th/U | <sup>206</sup> Pb*<br>(ppm) | <sup>204</sup> Pb/<br><sup>206</sup> Pb | ±<br>2σ error | f <sub>206</sub><br>% | Radiogenic                             |               | Age (Ma)                               |               |  |
|---------------------------------------------------------|------------|-------------|------|-----------------------------|-----------------------------------------|---------------|-----------------------|----------------------------------------|---------------|----------------------------------------|---------------|--|
|                                                         |            |             |      |                             |                                         |               |                       | <sup>206</sup> Pb/<br><sup>238</sup> U | ±<br>2σ error | <sup>206</sup> Pb/<br><sup>238</sup> U | ±<br>2σ error |  |
| <b>Phyllonite (FC0851); 51°31'14.4"S - 73°34'14.4"W</b> |            |             |      |                             |                                         |               |                       |                                        |               |                                        |               |  |
| 9.1                                                     | 220        | 45          | 0.20 | 7.2                         | 0.023542                                | 0.001312      | 43.5                  | 0.0214                                 | 0.0008        | 136                                    | 5             |  |
| 9.2                                                     | 58         | 86          | 1.48 | 18.1                        | 0.051589                                | 0.001420      | 93.3                  | 0.0241                                 | 0.0032        | 154                                    | 20            |  |
| 9.3*                                                    | 50         | 56          | 1.13 | 16.6                        | 0.049068                                | 0.001295      | 87.8                  | 0.0473                                 | 0.0047        | 298                                    | 29            |  |
| 15.1*                                                   | 54         | 80          | 1.47 | 20.0                        | 0.050365                                | 0.001235      | 90.1                  | 0.0422                                 | 0.0044        | 266                                    | 27            |  |
| 18.1*                                                   | 44         | 64          | 1.44 | 12.7                        | 0.049859                                | 0.001199      | 90.0                  | 0.0335                                 | 0.0033        | 212                                    | 20            |  |
| 25.1*                                                   | 39         | 44          | 1.14 | 10.1                        | 0.048304                                | 0.001369      | 87.1                  | 0.0388                                 | 0.0038        | 245                                    | 24            |  |
| 26.1*                                                   | 66         | 39          | 0.60 | 7.6                         | 0.044377                                | 0.001609      | 81.3                  | 0.0254                                 | 0.0023        | 161                                    | 15            |  |
| 27.1                                                    | 61         | 69          | 1.14 | 16.3                        | 0.051455                                | 0.001503      | 93.5                  | 0.0203                                 | 0.0028        | 130                                    | 18            |  |
| 28.1                                                    | 58         | 100         | 1.73 | 16.6                        | 0.051824                                | 0.001217      | 94.0                  | 0.0200                                 | 0.0023        | 128                                    | 15            |  |
| 29.1                                                    | 199        | 70          | 0.35 | 8.8                         | 0.030965                                | 0.001576      | 57.1                  | 0.0220                                 | 0.0011        | 140                                    | 7             |  |
| 30.1                                                    | 234        | 51          | 0.22 | 8.1                         | 0.026442                                | 0.001087      | 48.9                  | 0.0206                                 | 0.0007        | 132                                    | 4             |  |
| 31.1                                                    | 79         | 47          | 0.60 | 5.9                         | 0.041181                                | 0.001666      | 75.8                  | 0.0211                                 | 0.0017        | 135                                    | 11            |  |

Notes:  
 1. Uncertainties given at the one s level.  
 2. Error in BLR-1 reference sphene U-Pb calibration was 0.88% for the analytical session. (not included in above errors but required when comparing data from different mounts).  
 3. f<sub>206</sub> % denotes the percentage of <sup>206</sup>Pb that is common Pb.  
 4. Correction for common Pb has been made using the measured <sup>204</sup>Pb/<sup>206</sup>Pb ratios  
 5. Common-Pb plane intercepts at:  
<sup>206</sup>Pb/<sup>204</sup>Pb = 18.68 ±0.33  
<sup>207</sup>Pb/<sup>204</sup>Pb = 15.71 ±0.28  
<sup>207</sup>Pb/<sup>206</sup>Pb = 0.84101  
 error correl. = +0.9548  
 Stacey-Kramers Age = 183 Ma  
 Stacey-Kramers Mu = 10.09

\*: denotes analyses excluded in the age calculation.  
 Datum of geographic coordinates is WGS84.

**Supplementary Table S4b. LA-MC-ICP-MS U-Pb results for titanite in pillowed metabasalts from the Tortuga Complex**

| area.<br>spot                                             | Spot size<br>um | 206Pb cps<br>measured | <sup>206</sup> Pb/<br><sup>238</sup> U | ±<br>2σ error | <sup>207</sup> Pb/<br><sup>206</sup> Pb | ±<br>2σ error | f <sub>206</sub><br>% | Radiogenic                             |               | Age (Ma)                               |               |  |
|-----------------------------------------------------------|-----------------|-----------------------|----------------------------------------|---------------|-----------------------------------------|---------------|-----------------------|----------------------------------------|---------------|----------------------------------------|---------------|--|
|                                                           |                 |                       |                                        |               |                                         |               |                       | <sup>206</sup> Pb/<br><sup>238</sup> U | ±<br>2σ error | <sup>206</sup> Pb/<br><sup>238</sup> U | ±<br>2σ error |  |
| <b>Metabasalt (TN0715A2); 55°13'17.4"S - 68°00'34.4"W</b> |                 |                       |                                        |               |                                         |               |                       |                                        |               |                                        |               |  |
| 1A                                                        | 40              | 30597                 | 0.1124                                 | 0.0052        | 0.7083                                  | 0.0095        | 17.6                  | 0.01975                                | 0.00091       | 126.1                                  | 5.8           |  |
| 1B-1                                                      | 40              | 26366                 | 0.1182                                 | 0.0049        | 0.7130                                  | 0.0087        | 17.0                  | 0.02008                                | 0.00084       | 128.2                                  | 5.3           |  |
| 1B-2                                                      | 40              | 18704                 | 0.0787                                 | 0.0025        | 0.6575                                  | 0.0081        | 23.9                  | 0.01882                                | 0.00059       | 120.2                                  | 3.8           |  |
| 2A                                                        | 40              | 20523                 | 0.1056                                 | 0.0049        | 0.7134                                  | 0.0102        | 16.9                  | 0.01789                                | 0.00084       | 114.3                                  | 5.3           |  |
| 2B                                                        | 40              | 18001                 | 0.1055                                 | 0.0045        | 0.7170                                  | 0.0101        | 16.5                  | 0.01740                                | 0.00075       | 111.2                                  | 4.8           |  |
| 3-1                                                       | 40              | 12286                 | 0.1955                                 | 0.0125        | 0.7708                                  | 0.0092        | 9.8                   | 0.01910                                | 0.00122       | 122.0                                  | 7.8           |  |
| 3-2                                                       | 40              | 10134                 | 0.1454                                 | 0.0064        | 0.7475                                  | 0.0102        | 12.7                  | 0.01842                                | 0.00081       | 117.7                                  | 5.2           |  |
| 3-3                                                       | 40              | 12486                 | 0.1845                                 | 0.0069        | 0.7640                                  | 0.0090        | 10.6                  | 0.01959                                | 0.00073       | 125.1                                  | 4.7           |  |
| 4-1                                                       | 40              | 36893                 | 0.2113                                 | 0.0098        | 0.7837                                  | 0.0085        | 8.2                   | 0.01724                                | 0.00080       | 110.2                                  | 5.1           |  |
| 4-2                                                       | 40              | 30367                 | 0.1963                                 | 0.0087        | 0.7778                                  | 0.0091        | 8.9                   | 0.01746                                | 0.00078       | 111.6                                  | 5.0           |  |
| 5-1                                                       | 40              | 24018                 | 0.0773                                 | 0.0027        | 0.6696                                  | 0.0084        | 22.4                  | 0.01732                                | 0.00060       | 110.7                                  | 3.8           |  |
| 5-2                                                       | 40              | 17793                 | 0.0850                                 | 0.0028        | 0.6741                                  | 0.0078        | 21.8                  | 0.01856                                | 0.00061       | 118.5                                  | 3.9           |  |
| 5-3                                                       | 40              | 26113                 | 0.1307                                 | 0.0048        | 0.7278                                  | 0.0085        | 15.1                  | 0.01979                                | 0.00073       | 126.3                                  | 4.7           |  |
| 6-1                                                       | 40              | 11865                 | 0.1181                                 | 0.0043        | 0.7271                                  | 0.0088        | 15.2                  | 0.01797                                | 0.00065       | 114.8                                  | 4.2           |  |
| 6-2                                                       | 40              | 10440                 | 0.1107                                 | 0.0065        | 0.6992                                  | 0.0090        | 18.7                  | 0.02071                                | 0.00122       | 132.1                                  | 7.8           |  |
| 6-3                                                       | 40              | 11096                 | 0.1225                                 | 0.0085        | 0.7232                                  | 0.0085        | 15.7                  | 0.01924                                | 0.00134       | 122.9                                  | 8.5           |  |

Datum of geographic coordinates is WGS84.
